# Supplementary material
Source: Springer Nature journal article supplement (https://www.springermedizin.de/resource/supplementary/12889_2012_4616_MOESM5_ESM.pdf/9493240)
Supplement: MOESM5 [file 9493240]

**Additional file 5**  
**Resource Model Parameters and Values**  
**The AsiaFluCap Simulator**

| <b>Resource parameter</b>                        | <b>Description</b>                                                                                          | <b>Chosen value</b> | <b>Justification/notes (<u>all values</u> can be changed by users in the interface)</b>                                                                    |
|--------------------------------------------------|-------------------------------------------------------------------------------------------------------------|---------------------|------------------------------------------------------------------------------------------------------------------------------------------------------------|
| $P_{surge}$                                      | Proportion of total resource capacity that is available for influenza outbreak control and management.      | 0.12                | Proportion based on [1-3].                                                                                                                                 |
| $P_{threshold}$                                  | Proportion of hospital beds that have to be occupied by cases before high pandemic activity period starts.  | 0.75                | Arbitrary value. In our baseline scenarios we did not account for changes in resource use during the pandemic.                                             |
| $P_{AbsenteeismPeak}$                            | Proportion of health care workers not available due to absenteeism.                                         | 0.15                | 10% absenteeism healthcare workers [4], 30% health care staff illness with work absences of up to 8 days [5], 40-70% absenteeism of health care staff [6]. |
| $H_{hoursdayshiftsTotal}$                        | Total number of hours of both day shifts                                                                    | 16                  | We assumed a work day to be divided into two day shifts and one night.                                                                                     |
| $H_{hoursnightshift}$                            | Number of hours of night shift                                                                              | 8                   | We assumed a work day to be divided into two day shifts and one night.                                                                                     |
| $H_{workperday}$                                 | Number of work hours per day                                                                                | 10                  | During the pandemic peak we assumed a 10 hour work day for health care workers.                                                                            |
| $N_{workdaysweek}$                               | Number of work days per week                                                                                | 5                   | We assumed 5/7 days of work for health care workers during pandemic peak.                                                                                  |
| $H_{averageworkhoursperday}$                     | Average number of hours health care workers are available per day seen over one week.                       | 7.1                 | $H_{workday} * (N_{workdaysperweek}/7)$                                                                                                                    |
| $P_{maskn95LOW}/$<br>$P_{maskn95HIGH}$           | Number of masks N-95 / N-99 required per influenza case per day during low / high pandemic activity period. | 1                   | 10 N-95 respirators needed throughout hospital stay for non-ventilated hospitalised cases [7], mean 19.4 N95 masks per patients in the first 6 hours [8].  |
| $F_{ventilatedmask95}$                           | Factor indicating the number of times more units are required per ventilated (ICU) case.                    | 2                   | 20 N-95 respirators needed throughout hospital stay for ventilated hospitalised cases [7]                                                                  |
| $P_{SurgicalmaskLOW}/$<br>$P_{SurgicalmaskHIGH}$ | Number of surgical masks required per influenza case per day during low / high pandemic activity period.    | 5                   | 30 surgical masks needed per patient throughout hospital stay[7], 4,450 surgical masks needed (used by staff, patients and visitors) for 7 days for 29     |

|                                              |                                                                                                             |           |                                                                                                                                                                                                                                      |
|----------------------------------------------|-------------------------------------------------------------------------------------------------------------|-----------|--------------------------------------------------------------------------------------------------------------------------------------------------------------------------------------------------------------------------------------|
|                                              |                                                                                                             |           | cases and WHO estimates are 2,436 [9],                                                                                                                                                                                               |
| $F_{ventilatedsurmask}$                      | Factor indicating the number of times more units are required per ventilated (ICU) case.                    | $2^{1/3}$ | 80 surgical masks needed per patient throughout hospital stay [7].                                                                                                                                                                   |
| $P_{FaceshieldLOW/}$<br>$P_{FaceshieldHIGH}$ | Number of face shields required per influenza case per day during low / high pandemic activity period.      | 1         | Assumption based on [7, 9].                                                                                                                                                                                                          |
| $F_{ventilatedfaceshield}$                   | Factor indicating the number of times more units are required per ventilated (ICU) case.                    | 2         | Assumption based on [7, 9].                                                                                                                                                                                                          |
| $P_{GlovespairLOW/}$<br>$P_{GlovespairHIGH}$ | Number of gloves (in pairs) required per influenza case per day during low / high pandemic activity period. | 4         | 40 surgical gloves needed per patient throughout hospital stay [7], 8400 gloves (pairs) needed for 7 days for 29 cases and WHO estimates are 406 gloves (pairs) [9]. Mean 25.1 pairs of gloves per patient in the first 6 hours [8]. |
| $F_{ventilatedgloves}$                       | Factor indicating the number of times more units are required per ventilated (ICU) case.                    | $2^{1/2}$ | 100 surgical gloves needed per ventilated patient throughout hospital stay [7].                                                                                                                                                      |
| $P_{GownsLOW/}$<br>$P_{GownsHIGH}$           | Number of coverall gowns required per influenza case per day during low / high pandemic activity period.    | 3         | Assumption based on [9]. Mean 22.1 gowns per patients in first 6 hours [8].                                                                                                                                                          |
| $F_{ventilatedgowns}$                        | Factor indicating the number of times more units are required per ventilated (ICU) case.                    | 2         | Assumption based on [9].                                                                                                                                                                                                             |
| $P_{vac}$                                    | Proportion of (susceptible) population that will be vaccinated                                              | -         | Value set to 0 for baseline scenario. Users can include vaccination in interface (and indicate whether only risk groups are vaccinated or the whole population).                                                                     |
| $N_{vaccinperperson}$                        | Number of vaccines per person                                                                               | -         | For instance: 1 or 2 doses needed per person.                                                                                                                                                                                        |
| $v$                                          | Vaccine efficacy                                                                                            | -         | Proportion which can be varied between 0 – 1.                                                                                                                                                                                        |
| $P_{antivirals}$                             | Courses (oseltamivir) per new influenza case (receiving antivirals)                                         | 1         | One course defined as ten capsules (75 mg twice daily for five days) [10-14].                                                                                                                                                        |

|                                            |                                                                                                     |               |                                                                                                                                                                                                                                                                   |
|--------------------------------------------|-----------------------------------------------------------------------------------------------------|---------------|-------------------------------------------------------------------------------------------------------------------------------------------------------------------------------------------------------------------------------------------------------------------|
| $P_{antibioticsLOW} / P_{antibioticsHIGH}$ | Antibiotics (grams) required per influenza case per day during low / high pandemic activity period. | 0.420         | Course is 500 mg twice daily for 5 days [15-17]. We assumed that cases only receive one course during their stay. An average hospital stay was assumed to be 12 days for non-ventilated cases: 5000 mg / 12 days.                                                 |
| $F_{ventilatedAntibiotics}$                | Factor indicating the number of times more antibiotics are required per ventilated (ICU) case.      | $^{12}/_{13}$ | Course is 500 mg twice daily for 5 days [15-17]. We assumed that all cases only receive 1 course during their stay. As an average hospital stay was assumed to be 13 days for ventilated cases, we used: non-ventilated depletion rate times (12 days / 13 days). |
| $P_{NonventilatedAntibiotics}$             | Proportion non-ventilated hospitalised cases requiring antibiotics.                                 | 0.74          | 74% of normal hospitalised cases required antibiotics [15].                                                                                                                                                                                                       |
| $P_{VentilatedAntibiotics}$                | Proportion ventilated hospitalised cases requiring antibiotics.                                     | 0.95          | 95% of ICU cases required antibiotics [15].                                                                                                                                                                                                                       |
| $P_{IVfluidsLOW} / P_{IVfluidsHIGH}$       | IV fluids (liters) required per influenza case per day during low / high pandemic activity period.  | 2.5           | Assumption based on: hospital standard IV fluid regime 2.5 L/25 h [18].                                                                                                                                                                                           |
| $F_{ventilatedIVfluids}$                   | Factor indicating the number of times more antibiotics are required per ventilated (ICU) case.      | 1             | Assumption based on: hospital standard IV fluid regime 2.5 L/25 h [18].                                                                                                                                                                                           |
| $P_{NonventilatedIVfluids}$                | Proportion of non-ventilated cases receiving IV Fluids.                                             | 1             | We assumed that all hospitalised cases received IV fluids (these proportions can be changed in the interface).                                                                                                                                                    |
| $P_{VentilatedIVfluids}$                   | Proportion of ventilated cases receiving IV Fluids.                                                 | 1             |                                                                                                                                                                                                                                                                   |
| $R_{DayNonVentMDphysicians}$               | Ratio medical doctors / physicians : non-ventilated hospitalised cases, day shift                   | 1 : 10        | One physician can take care for 10 cases during day shift [2, 7].                                                                                                                                                                                                 |

|                                       |                                                                                                                       |         |                                                                                                                                                                 |
|---------------------------------------|-----------------------------------------------------------------------------------------------------------------------|---------|-----------------------------------------------------------------------------------------------------------------------------------------------------------------|
| $R_{\text{NightNonVentMDphysicians}}$ | Ratio medical doctors / physicians : non-ventilated hospitalised cases, night shift.                                  | 1 : 40  | One physician can take care for 40 cases during night shift [2, 7]                                                                                              |
| $R_{\text{DayVentMDphysicians}}$      | Ratio medical doctors/ physician : ventilated hospitalised cases, day shift.                                          | 1 : 4   | Assumed based on [2, 7].                                                                                                                                        |
| $R_{\text{NightVentMDphysicians}}$    | Ratio medical doctors/ physicians : ventilated hospitalised cases, night shift.                                       | 1 : 4   | Assumed based on [2, 7].                                                                                                                                        |
| $P_{\text{casesvisitingGP}}$          | Proportion of cases outside the hospital requiring a General Practitioners / Primary Care Physicians                  | 0.08    | Cumulative attack rate for GP consultants of 8.26% during H1N1 pandemic [19].                                                                                   |
| $H_{\text{hoursGPneededpercase}}$     | Average duration of one consultation (in hours)                                                                       | 0.25    | We assumed that one consultation takes 15 min (minutes/60). One mild case or outpatient was assumed to require one consultation during his/her days of illness. |
| $R_{\text{DayNonVentInternalMS}}$     | Ratio internal medicine specialist: non-ventilated hospitalised cases, day shift                                      | 1 : 100 | Assumptions for the AsiaFluCap model, based on [9]. Values can be changed in the interface.                                                                     |
| $R_{\text{NightNonVentInternalMS}}$   | Ratio internal medicine specialist: non-ventilated hospitalised cases, night shift                                    | 1 : 200 |                                                                                                                                                                 |
| $R_{\text{DayVentInternalMS}}$        | Ratio internal medicine specialist : ventilated hospitalised cases, day shift                                         | 1 : 50  |                                                                                                                                                                 |
| $R_{\text{NightVentInternalMS}}$      | Ratio internal medicine specialist : ventilated hospitalised cases, night shift                                       | 1 : 100 |                                                                                                                                                                 |
| $R_{\text{DayNonVentOtherDoctors}}$   | Ratio other doctors (e.g. surgeons, pediatricians, obstetricians, etc.): non-ventilated hospitalised cases, day shift | 1 : 15  | Assumptions for the AsiaFluCap model, based on [9]. Values can be changed in the interface.                                                                     |

|                                |                                                                      |        |                                                                                                                                                                                                        |
|--------------------------------|----------------------------------------------------------------------|--------|--------------------------------------------------------------------------------------------------------------------------------------------------------------------------------------------------------|
| $R_{NightNonVentOtherDoctors}$ | Ratio other doctors : non-ventilated hospitalised cases, night shift | 1 : 40 |                                                                                                                                                                                                        |
| $R_{DayVentOtherDoctors}$      | Ratio other doctors : ventilated hospitalised cases, day shift       | 1 : 10 |                                                                                                                                                                                                        |
| $R_{NightVentOtherDoctors}$    | Ratio other doctors: ventilated hospitalised cases, night shift      | 1 : 20 |                                                                                                                                                                                                        |
| $R_{DayNonVentOtherNurses}$    | Ratio nurses : non-ventilated hospitalised cases, day shift          | 1 : 5  | Assumption based on [7, 9].                                                                                                                                                                            |
| $R_{NightNonVentOtherNurses}$  | Ratio nurses : non-ventilated hospitalised cases, night shift        | 1 : 10 | Assumption based on [7, 9].                                                                                                                                                                            |
| $R_{DayVentOtherNurses}$       | Ratio nurses : ventilated hospitalised cases, day shift              | 1 : 1  | Assumption based on [7, 9].                                                                                                                                                                            |
| $R_{NightVentOtherNurses}$     | Ratio nurses : ventilated hospitalised cases, night shift            | 1 : 2  | Assumption based on [7, 9].                                                                                                                                                                            |
| $H_{pharmacistpercase}$        | Number of hours a pharmacists need per influenza case.               | 20/60  | For preparing AV courses, and checking drug supplies in hospital (every morning and afternoon)[9]. We assumed that a pharmacist would require 20 minutes in total for one influenza case.              |
| $R_{LaboratoryTCases}$         | Ratio laboratory technicians: influenza cases.                       | 1 : 30 | This ratio implicates the number of cases which one laboratory technician can process (virus isolation, etc.) during one work day. Note that processing/testing clinical specimens takes > 1 day [20]. |
| $R_{PublicHealthPCases}$       | Ratio Public Health Personnel : influenza cases                      | 1 : 50 | This ratio implicates the number of cases one staff member can process during one work day.                                                                                                            |
| $R_{VolunteersCases}$          | Ratio volunteers : influenza cases                                   | 1 : 5  | We assumed that volunteers can substitute nurses in case needed.                                                                                                                                       |
| $R_{AdminStaffCases}$          | Ratio administrative staff (hospital) : influenza cases.             | 1 : 25 | We assumed that per certain number of cases one administrative staff member is required in the hospital (for instance per ward) [9].                                                                   |

|                           |                                                                              |         |                                                                                                                                                                                                                  |
|---------------------------|------------------------------------------------------------------------------|---------|------------------------------------------------------------------------------------------------------------------------------------------------------------------------------------------------------------------|
| $H_{AmbulanceCase}$       | Total duration (in hours) of transport per influenza case.                   | 2       | Average mission duration per patient is two hours [21].                                                                                                                                                          |
| $P_{casesambulances}$     | Proportion of all hospitalised cases that requires ambulance.                | 0.15    | Around 10% of all hospitalised influenza cases required transport, to the hospital or to other advanced health care facilities [22, 23] , 83% of all hospitalised cases uses one [24].                           |
| $H_{OthertransportCase}$  | Total duration (in hours) of transport per influenza case.                   | 2       | Average mission duration per patient is two hours [21].                                                                                                                                                          |
| $P_{casesOthertransport}$ | Proportion of all hospitalised cases that requires other transport vehicles. | 0.05    | Assumption based on: around 10% of all hospitalised influenza cases required transport, to the hospital or to other advanced health care facilities [22, 23].                                                    |
| $H_{XrayCase}$            | Total duration of one x-ray scan (in hours)                                  | 30 / 60 | We assumed that one x-ray takes 30 minutes.                                                                                                                                                                      |
| $P_{XrayCase}$            | Proportion of all ventilated hospitalised cases undertaking an x-ray.        | 0.2     | We assumed that only a proportion of all ventilated cases undertook an x-ray. Assumption based on: one patient required a portable chest x-ray [9], 50% of cases in nursing home residents had x-ray taken [25]. |

## References

1. Kanter RK, Moran JR: **Hospital emergency surge capacity: an empiric New York statewide study.** *Ann Emerg Med* 2007, **50**(3):314-319.
2. Putthasri W, Lertiendumrong J, Chompook P, Tangcharoensathien V, Coker R: **Capacity of Thailand to contain an emerging influenza pandemic.** *Emerg Infect Dis* 2009, **15**(3):423-432.
3. Schull MJ, Stukel TA, Vermeulen MJ, Guttman A, Zwarenstein M: **Surge capacity associated with restrictions on nonurgent hospital utilization and expected admissions during an influenza pandemic: lessons from the Toronto severe acute respiratory syndrome outbreak.** *Acad Emerg Med* 2006, **13**(11):1228-1231.
4. Nap RE, Andriessen MP, Meessen NE, Miranda Ddos R, van der Werf TS: **Pandemic influenza and excess intensive-care workload.** *Emerg Infect Dis* 2008, **14**(10):1518-1525.

5. Challen K, Bentley A, Bright J, Walter D: **Clinical review: mass casualty triage--pandemic influenza and critical care.** *Crit Care* 2007, **11**(2):212.
6. Anderson TA, Hart GK, Kainer MA: **Pandemic influenza-implications for critical care resources in Australia and New Zealand.** *Journal of critical care* 2003, **18**(3):173-180.
7. Krumkamp R, Kretzschmar M, Rudge JW, Ahmad A, Hanvoravongchai P, Westenhoefer J, Stein M, Putthasri W, Coker R: **Health service resource needs for pandemic influenza in developing countries: a linked transmission dynamics, interventions and resource demand model.** *Epidemiol Infect* 2011:1-9.
8. Swaminathan A, Martin R, Gamon S, Aboltins C, Athan E, Braitberg G, Catton MG, Cooley L, Dwyer DE, Edmonds D *et al*: **Personal protective equipment and antiviral drug use during hospitalization for suspected avian or pandemic influenza.** *Emerg Infect Dis* 2007, **13**(10):1541-1547.
9. Phin NF, Rylands AJ, Allan J, Edwards C, Enstone JE, Nguyen-Van-Tam JS: **Personal protective equipment in an influenza pandemic: a UK simulation exercise.** *J Hosp Infect* 2009, **71**(1):15-21.
10. Carrat F, Luong J, Lao H, Salle AV, Lajaunie C, Wackernagel H: **A 'small-world-like' model for comparing interventions aimed at preventing and controlling influenza pandemics.** *BMC Med* 2006, **4**:26.
11. Ciofi degli Atti ML, Merler S, Rizzo C, Ajelli M, Massari M, Manfredi P, Furlanello C, Scalia Tomba G, Iannelli M: **Mitigation measures for pandemic influenza in Italy: an individual based model considering different scenarios.** *PLoS One* 2008, **3**(3):e1790.
12. Germann TC, Kadau K, Longini IM, Jr., Macken CA: **Mitigation strategies for pandemic influenza in the United States.** *Proc Natl Acad Sci U S A* 2006, **103**(15):5935-5940.
13. Longini IM, Jr., Halloran ME, Nizam A, Yang Y: **Containing pandemic influenza with antiviral agents.** *Am J Epidemiol* 2004, **159**(7):623-633.
14. van Genugten ML, Heijnen ML, Jager JC: **Pandemic influenza and healthcare demand in the Netherlands: scenario analysis.** *Emerg Infect Dis* 2003, **9**(5):531-538.
15. Jain S, Kamimoto L, Bramley AM, Schmitz AM, Benoit SR, Louie J, Sugerman DE, Druckenmiller JK, Ritger KA, Chugh R *et al*: **Hospitalized patients with 2009 H1N1 influenza in the United States, April-June 2009.** *N Engl J Med* 2009, **361**(20):1935-1944.
16. World Health Organization (WHO): **Pocket book of hospital care for children Guidelines for the management of common illnesses with limited resources.**  
[[http://www.who.int/child\\_adolescent\\_health/news/events/2011/14\\_02\\_2011/en/](http://www.who.int/child_adolescent_health/news/events/2011/14_02_2011/en/)]
17. World Health Organization (WHO): **Reducing excess mortality from common illnesses.**[[http://www.who.int/diseasecontrol\\_emergencies/common\\_illnesses2008\\_6.pdf](http://www.who.int/diseasecontrol_emergencies/common_illnesses2008_6.pdf)]
18. Vermeulen H, Hofland J, Legemate DA, Ubbink DT: **Intravenous fluid restriction after major abdominal surgery: a randomized blinded clinical trial.** *Trials* 2009, **10**:50.

19. D'Ortenzio E, Renault P, Jaffar-Bandjee MC, Gauzere BA, Lagrange-Xelot M, Fouillet A, Poubeau P, Winer A, Bourde A, Staikowsky F *et al*: **A review of the dynamics and severity of the pandemic A(H1N1) influenza virus on Reunion island, 2009.** *Clin Microbiol Infect* 2010, **16**(4):309-316.
20. World Health Organization (WHO): **Manual for the laboratory diagnosis and virological surveillance of influenza.**  
[\[http://whqlibdoc.who.int/publications/2011/9789241548090\\_eng.pdf\]](http://whqlibdoc.who.int/publications/2011/9789241548090_eng.pdf)
21. Ciapetti M, Cianchi G, Zagli G, Greco C, Pasquini A, Spina R, Batacchi S, Bonizzoli M, Bonacchi M, Lazzeri C *et al*: **Feasibility of inter-hospital transportation using extra-corporeal membrane oxygenation (ECMO) support of patients affected by severe swine-flu(H1N1)-related ARDS.** *Scand J Trauma Resusc Emerg Med* 2011, **19**:32.
22. D'Ancona G, Capitano G, Chiaramonte G, Serretta R, Turrisi M, Pilato M, Arcadipane A: **Extracorporeal membrane oxygenator rescue and airborne transportation of patients with influenza A (H1N1) acute respiratory distress syndrome in a Mediterranean underserved area.** *Interact Cardiovasc Thorac Surg* 2011, **12**(6):935-937.
23. Maritz J, Maree L, Preiser W: **Pandemic influenza A (H1N1) 2009: the experience of the first six months.** *Clin Chem Lab Med* 2010, **48**(1):11-21.
24. Hak E, Meijboom MJ, Buskens E: **Modelling the health-economic impact of the next influenza pandemic in The Netherlands.** *Vaccine* 2006, **24**(44-46):6756-6760.
25. Drinka PJ, Krause P, Nest L, Dissing M, Gravenstein S, Goodman BM: **The effect of culture-positive influenza type A on resource use and adverse events in nursing home residents.** *J Am Geriatr Soc* 2002, **50**(8):1416-1420.
